# Supplementary material for: Phase Diagrams of n-Type Low Bandgap Naphthalenediimide-Bithiophene Copolymer Solutions and Blends
Source: MDPI journal article supplement (doi:10.3390/polym11091474), 2019-09-09
Supplement: s1 [file s1]

# Supplementary Materials

## Phase Diagrams of n-Type Low Bandgap Naphthalenediimide-Bithiophene Copolymer Solutions and Blends

Gada Muleta Fanta<sup>1,2</sup>, Pawel Jarka<sup>1</sup>, Urszula Szeluga<sup>3</sup>, Tomasz Tański<sup>1</sup>, and Jung Yong Kim<sup>2,4,\*</sup>

*<sup>1</sup>Institute of Engineering Materials and Biomaterials, Faculty of Mechanical Engineering, Silesian University of Technology, 44-100 Gliwice, Poland*

*<sup>2</sup>School of Materials Science and Engineering, Jimma Institute of Technology, Jimma University, P.O. Box 378, Jimma, Ethiopia*

*<sup>3</sup>Center of Polymer and Carbon Materials to the Polish Academy of Sciences, M. Curie-Skłodowska 34 Str., 41-819 Zabrze, Poland*

*<sup>4</sup>School of Chemical Engineering, Jimma Institute of Technology, Jimma University, P.O. Box 378, Jimma, Ethiopia*

\* To whom correspondence should be addressed:

E-mail: jungyong.kim@ju.edu.et (J.Y. Kim)

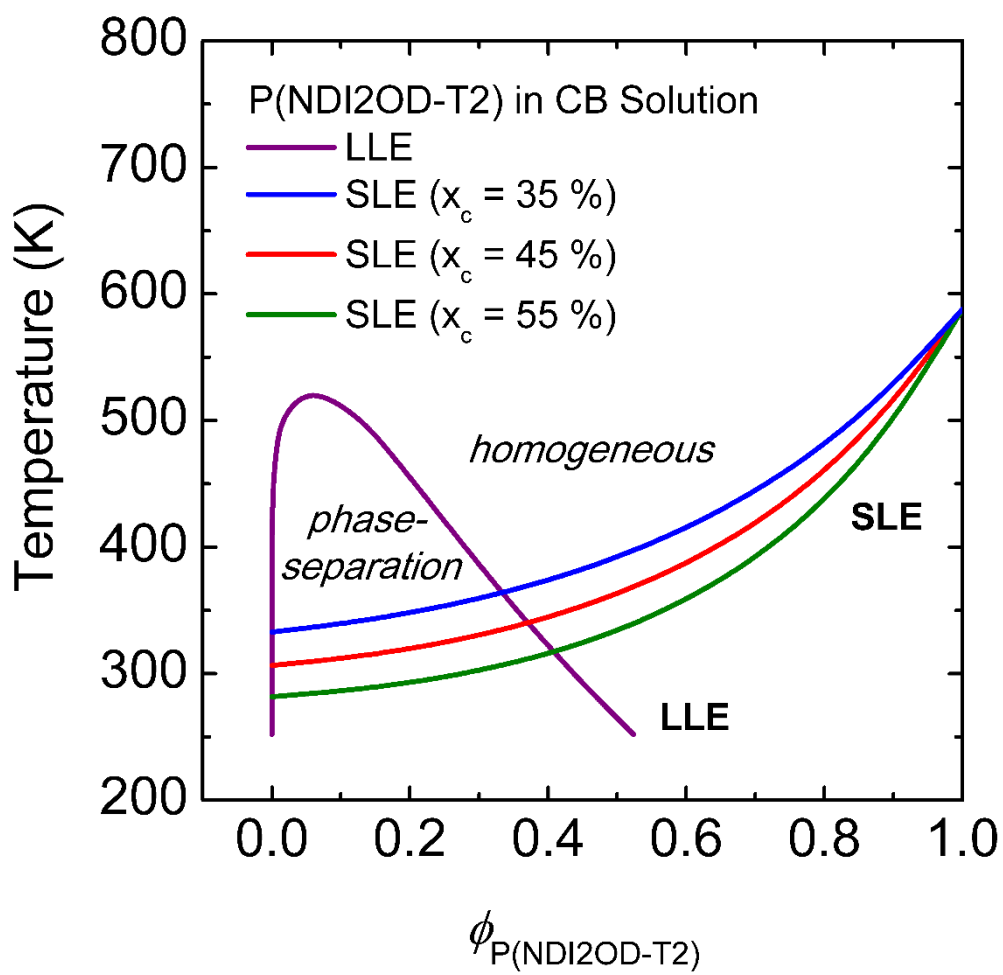

Figure S1. Theoretical phase diagrams of binary polymer solutions: P(NDI2OD-T2)-CB. Melting point depression curves are calculated for three hypothetical crystallinities of P(NDI2OD-T2), i.e.,  $x_c = 35\%$  (blue line), 45% (red), and 55% (green).

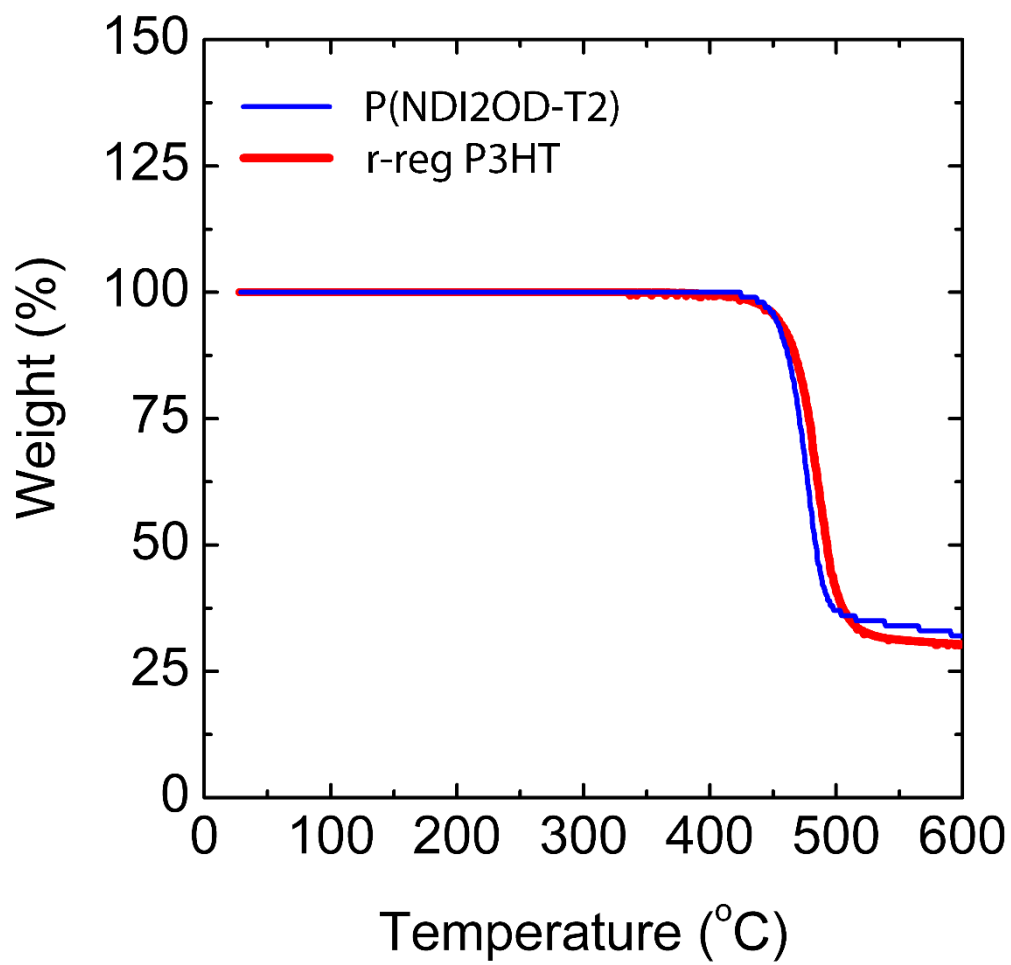

Figure S2. TGA thermograms of P(NDI2OD-T2) and r-reg P3HT.

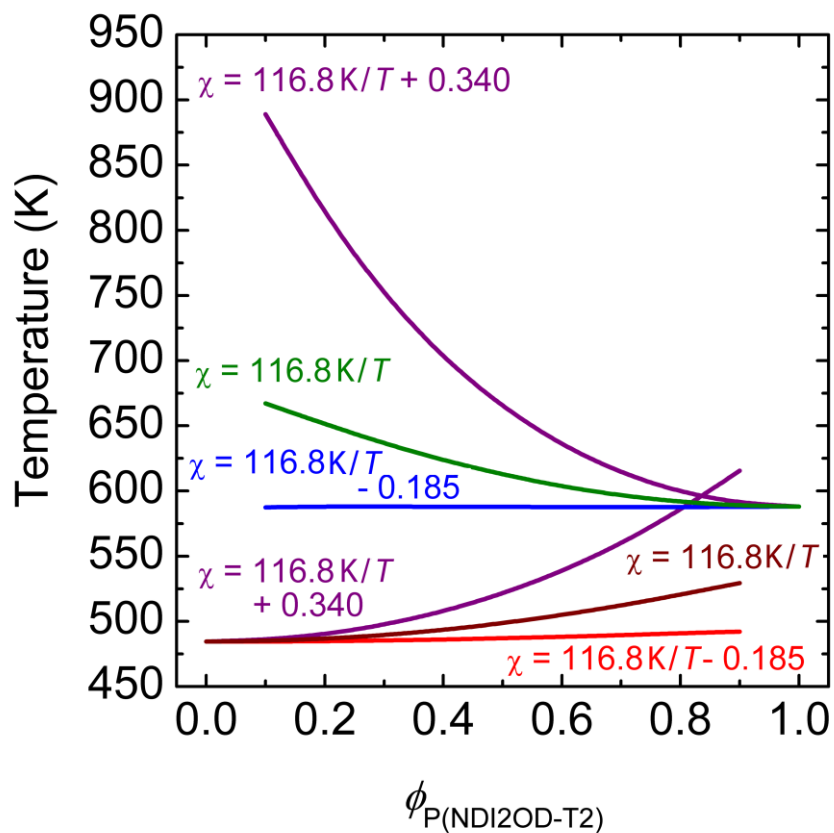

Figure S3. Theoretical description of melting points for the binary r-reg P3HT/P(NDI2OD-T2) system by using the theory of melting point depression combined with Flory-Huggins model incorporating the polymer-polymer interaction parameters of  $116.8 \text{ K/T} + 0.340$ ,  $116.8 \text{ K/T}$ , and  $116.8 \text{ K/T} - 0.185$ , respectively.
